# Supplementary material for: Two-hand static and dynamic Arabic sign language recognition using keypoints and shape descriptors with attention-driven feature fusion
Source: PeerJ journal article supplement (doi:10.7717/peerj-cs.3275), 2025-11-26
Supplement: ST1StaffSLW.docx [file ST1StaffSLW.docx]

| **Table 1. Algorithm 1: Algorithm for preprocessing** |
| --- |
| **Input:** Image , **Output:**  Refined Hand Silhouette  **Algorithm**  **procedure** **MAIN** (image)      results ← []      frame ← image  **Preprocessing**      sharpened_frame ← Unsharp_Masking( Bilateral_Filter(frame, d=9, σColor=75, σSpace=75))     enhanced_frame ← Histogram_Equalization(sharpened_frame)  **Face Removal**      faces ← Detect_Faces(Convert_To_Grayscale(enhanced_frame), Haar_Cascade)      **for** each (x, y, w, h) in faces **do**          Mask face region     **end for**  **Skin Detection**      ycrcb_frame ← Convert_To_YCrCb(face_removed_frame)      skin_mask ← Threshold(ycrcb_frame, lower=[0,133,77], upper=[255,173,127])  **Morphological Processing**  eroded_mask ← Erode(Dilate(skin_mask, kernel=5×5) , kernel=5×5)  **Area-Based Hand Extraction**  (labels, stats) ← Connected_Components(eroded_mask)      **for** each component Ci **do**          if Ai<1500Ai < 1500 **then** Remove Ci      **end for**      refined_mask ← Binary_Mask(valid_components)  **Occlusion Detection**  Compute optical flow F(x, y) = (u, v), Compute divergence: ∇⋅F(x,y) ,Normalize occlusion probability: O(x,y), Refine occlusion mask  results ← DISPLAY_RESULTS(all results)  return results **end procedure** |
